# Supplementary material for: Real-world routine diagnostic molecular analysis for TP53 mutational status is recommended over p53 immunohistochemistry in B-cell lymphomas
Source: PubMed Central journal article supplement (PMC11522076; doi:10.1007/s00428-023-03676-6), 2023-10-18
Supplement: 428_2023_3676_MOESM1_ESM.pdf [file 428_2023_3676_MOESM1_ESM.pdf]

TP53:NM\_000546

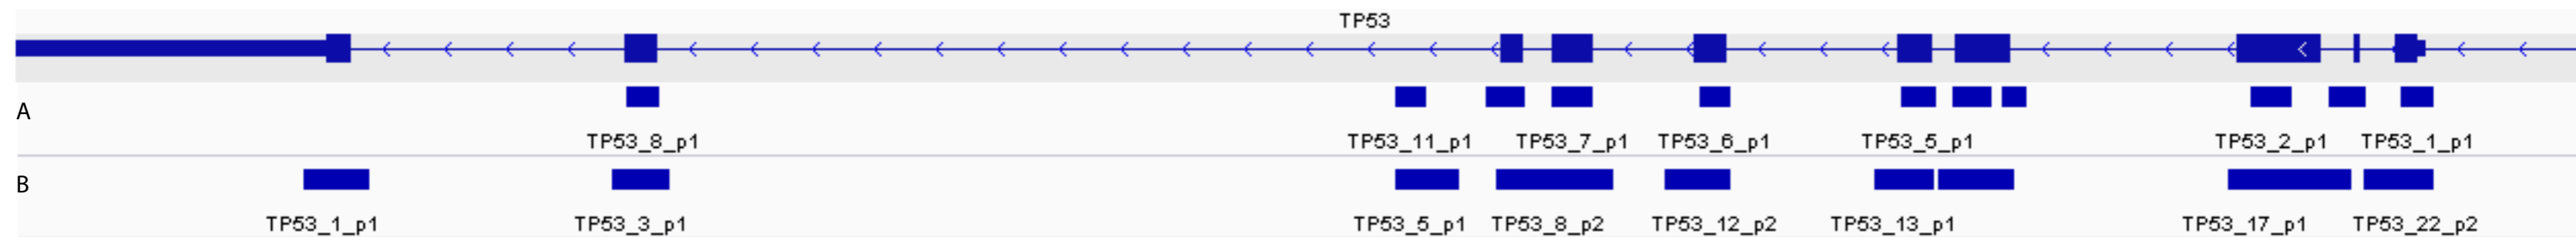

Supplementary figure 1. Graphical presentation of the regions covered by the two tNGS panels.
